# Supplementary material
Source: PubMed Central journal article supplement (PMC4079240)
Supplement: CJP-2014-vol59-March-131-140-eTables.pdf [file CJP-2014-vol59-March-131-140-eTables.pdf]

Sakinofsky I. Preventing suicide among inpatientse. Can J Psychiatry. 2014;59(3):131–140.

| <b>eTable 1 Meta-analysis or case-controlled prospective studies</b> |               |       |             |               |                                                                                                                           |
|----------------------------------------------------------------------|---------------|-------|-------------|---------------|---------------------------------------------------------------------------------------------------------------------------|
| Study (year)                                                         | Type          | Years | IP suicides | Place         | Findings                                                                                                                  |
| Angst et al (2002) <sup>90</sup>                                     | Cohort        | 22    | 406         | Zurich        | Affective disorders. Suicide mortality 10.8%, cardio- or cerebrovascular disease 34.5%. Altogether 76% died.              |
| Axelsson and Lagerkvist-Briggs (1992) <sup>91</sup>                  | Cohort        | 6     | 11          | Lund          | Psychotic IP. Depressed or elated mood, paranoid, prior suicidality.                                                      |
| Berglund and Nilsson (1987) <sup>92</sup>                            | Case register | 18    | 103/1206    | Lund          | Severe affectives only. Males rated brittle, acute onset, marital problems. Females attempted suicide before.             |
| Berglund (1984) <sup>93</sup>                                        | Case register | 18    | 88          | Lund          | Alcoholics only. More depressed and dysphoric, more brittle and sensitive                                                 |
| Berglund et al (1987b) <sup>94</sup>                                 | Case register | 18    | 67          | Lund          | Not affectives or alcoholics. Dependent, immature personalities overrepresented.                                          |
| Brent et al (1988) <sup>95</sup>                                     | Records       | 2     | 27          | Pittsburgh    | Adolescents. Bipolar disorder and affective disorder with comorbidity and firearm availability common                     |
| Choi et al (2012) <sup>96</sup>                                      | Records       | 3     | 43          | Seoul         | Risk increased with suicide attempts whether admitted or not, depression.                                                 |
| Cohen et al (1990) <sup>97</sup>                                     | Records       | 12    | 9           | Wisconsin     | Schizophrenia only. Young adult men at risk. Subjectively distressed, hopeless, dissatisfied with their lives.            |
| Craig et al (2006) <sup>98</sup>                                     | Cohort        | 5     | 7           | New York      | 4 nonorganic psychosis groups. Unlike retrospective reports, suicides clustered only after 2 years.                       |
| Erlangsen et al (2005) <sup>99</sup>                                 | Case register | 5     | 2323        | Denmark       | Population sample. More suicide risk if history of psychiatric hospital admission.                                        |
| Erlangsen et al (2006) <sup>100</sup>                                | Case register | 11    | 229         | Denmark       | 3/1000 hospitalizations over 11 years in >60 age group. Suicide concentrated <7 days after admission or discharge.        |
| Fagg et al (1993) <sup>101</sup>                                     | Case-control  | 7     | 62          | Edinburgh     | Parasuicide patients 15-24 who suicided. Multivariate risk factors: alcohol and (or) drug missuse and previous admission. |
| Fawcett et al (1987) <sup>102</sup>                                  | Follow-up     | 4     | 25/954      | United States | Affective disorders. Hopelessness, anhedonia, mood cycling predicted.                                                     |

|                                        |                |    |            |               |                                                                                                                          |
|----------------------------------------|----------------|----|------------|---------------|--------------------------------------------------------------------------------------------------------------------------|
| Fawcett et al (1990) <sup>103</sup>    | Follow-up      | 10 | 32/954     | United States | Affective disorders. Panic attacks, psychic anxiety, insomnia, reduced concentration, alcohol abuse, anhedonia <1 year.  |
| Fawcett (1988) <sup>82</sup>           | Follow-up      | 9  | 25/955     | United States | Affective disorders. Anhedonia, psychic anxiety, panic attacks, depressive turmoil and alcohol abuse predictors <1 year. |
| Hansen et al (2003) <sup>104</sup>     | Cohort         | 10 | 15         | Denmark       | Affective disorders. Comorbid personality disorder ("Character Deviation") increased risk 3.41.                          |
| Hoang et al (2011) <sup>105</sup>      | Record linkage | 1  |            | England       | Follow-up of IPs discharged with schizophrenia or bipolar disorder showed raised SMRs for suicide.                       |
| Hoyer et al (2009) <sup>89</sup>       | Case register  | 1  | 135        | Denmark       | 33% died during hospitalization. Suicide attempt and job loss history predicted suicide; improvement the opposite.       |
| Kan et al (2007) <sup>106</sup>        | Case-control   | 2  | 97         | Hong Kong     | Suicides <60 days postdischarge. Risk with previous admission for self-harm, compulsory admission, living alone.         |
| Kapur et al (2006) <sup>107</sup>      | NCI            | 7  | 187-156    | England       | Between 1997-2003 IP suicide rates fell 17% but postdischarge rates rose lightly.                                        |
| Kapur et al (2013) <sup>26</sup>       | NCI            | 12 | 1942       | England       | Between 1997-2008 rates fell 31.4% for both sexes but transfer to postdischarge settings is possible.                    |
| Large et al (2011) <sup>85</sup>       | Meta-analysis  |    | 28 studies | Sydney        | DSH. Hopelessness, guilt or inadequacy feelings, depressed mood, suicidal ideation, family history moderate predictors   |
| Links et al (2012) <sup>108</sup>      | Cohort         | 1  | 4/120      | Toronto       | Inner-city, high-risk cohort followed 6 months. Recent suicide attempts, living in a shelter, and impulsivity predicted. |
| Madsen et al (2012) <sup>84</sup>      | Cohort         | 10 | 279        | Denmark       | Time at risk considered. 50% dead <18 days of admission. Recent suicide attempt, being educated, personality disorder.   |
| Nordentoft et al (2011) <sup>109</sup> | Cohort         | 36 | 3365       | Denmark       | Follow-up of national cohorts of suicide in those with and without mental health services contact.                       |

DSH = deliberate self-harm

IP = inpatient

NCI = National Confidential Inquiry

SMR = standardized mortality ratio

**eTable 2 Case-controlled retrospective studies**

| Study (year)                             | Type                | Suicides | Place                    | Findings                                                                                                              |
|------------------------------------------|---------------------|----------|--------------------------|-----------------------------------------------------------------------------------------------------------------------|
| Agerbo et al (2001) <sup>110</sup>       | Nested case-control | 811      | Denmark                  | Higher-income IPs with mental illness more at risk than lower-income patients. Commentary by Gunnell.                 |
| Allebeck et al (1987) <sup>111</sup>     | Case register       | 68       | Stockholm                | Previous suicide attempts, females living alone, males abusing alcohol.                                               |
| Appleby et al (1999) <sup>112</sup>      | Case register       | 229      | Manchester               | Risk high in personality and affective disorders; most during authorized leave; assessed as no suicide risk.          |
| Bickley et al (2013) <sup>113</sup>      | Records             | 100      | England                  | 55% of IPs with mental illness died by suicide <1 week postdischarge.                                                 |
| Burgess et al (2000) <sup>114</sup>      | Case register       | 629      | Victoria, Australia      | 20% preventable: Poor staff-patient relations, risk incompletely assessed, poor treatment and continuity of care.     |
| Cheng et al (2009) <sup>30</sup>         | Records             | 27       | Taipei                   | Jumping, hanging, or drowning. Males oftener. Psychiatric patients warned more often than nonpsychiatric.             |
| Crisanti and Love (1999) <sup>115</sup>  | Records             | 49       | Calgary                  | Suicide mortality no higher in involuntarily detained IPs.                                                            |
| Deisenhammer et al (2000) <sup>116</sup> | Records             | 44       | Innsbruck                | 39% while absconded. Most open ward suicides enacted out of hospital.                                                 |
| Deisenhammer et al (2007) <sup>117</sup> | Records             | 665      | Innsbruck                | 28% of inpatient suicides <1 week after discharge.                                                                    |
| Dong et al (2005) <sup>118</sup>         | Records             | 92       | Hong Kong                | Majority schizophrenia; depressed, absconding, akathisia, perceived as at low rsik.                                   |
| Drake and Cotton (1986) <sup>119</sup>   | Records             | 15       | United States            | Schizophrenia IP sample. Persistent depressed mood among suicides, significantly more than control subjects.          |
| Drake et al (1984) <sup>120</sup>        | Records             | 15       | Cambridge, Massachusetts | Schizophrenia only. Educated, insight, depressed, hopeless.                                                           |
| Flood and Seager (1968) <sup>121</sup>   | Records             | 73       | Bristol                  | High frequency of disturbed relations with hospital staff and premature discharge against medical advice.             |
| Gaertner et al (2002) <sup>122</sup>     | Case-control        | 61       | Germany                  | Affective disorder most risk. Lithium given less often than controls. IPs with schizophrenia on full-dose tricyclics. |
| Gale et al (1980) <sup>123</sup>         | Hospital records    | 60       | New York                 | 5 hospitals compared. Patient acuity, and lower socioeconomic-ethnic status predictive.                               |
| Geddes et al (1997) <sup>124</sup>       | Cohort              | 2311     | Scotland                 | Almost 2-fold suicide risk in first 28 days, compared with rest of the year.                                          |

|                                                  |                  |          |              |                                                                                                                                      |
|--------------------------------------------------|------------------|----------|--------------|--------------------------------------------------------------------------------------------------------------------------------------|
| Goldacre et al (1993) <sup>125</sup>             | Case-control     | 134      | Oxford       | Very high risk for suicide in first month after discharge from hospital after a psychiatric admission, compared with rest of year.   |
| Haklai et al (2011) <sup>126</sup>               | Record linkage   | RR=16.3* | Israel       | Age-adjusted suicide risk very high for those ever hospitalized (RR = 16). Noncancer natural causes RR = 113.                        |
| Hattori et al (1995) <sup>127</sup>              | Charts           | 36       | Japan        | Schizoaffective and depressive disorders frequent. Intrafamilial conflict, loss, and loneliness inculcated.                          |
| Heila et al (2005) <sup>128</sup>                | Record linkage   | 1479     | Finland      | Schizophrenia. Onset of bed reductions of 1980-96 increased mortality only in early phase patients, not generally.                   |
| Ho (2003) <sup>129</sup>                         | Record linkage   | 280      | Hong Kong    | 280/21921 patients (1.3%) died by suicide <1 year after discharge. Of these, 85/280 (30.4%) were <28 days postdischarge.             |
| Ho (2006) <sup>130</sup>                         | Record linkage   | 333      | Hong Kong    | Contrary to other studies, patients hospitalized for short (<15 day) periods had lower suicide risk after discharge.                 |
| Hoffman and Modestin (1987) <sup>131</sup>       | Case-control     | 53       | Berne Canton | Previous suicide attempts especially if serious, repeated but not multiple attempts were predictive.                                 |
| Holley et al (1998) <sup>132</sup>               | Charts           | 49       | Alberta      | First-ever hospitalizations for suicide attempt. Risk higher in older females, males, low-income area, violent method.               |
| Honkonen et al (2008) <sup>133</sup>             | Charts           | 94       | Finland      | Half the deaths were alcohol- or drug-related. Mood disorders and use of coercive measures increased risk.                           |
| Hung et al (2000) <sup>134</sup>                 | Records          | 15       | Taipei       | Medical IPs. Highest fatality rates on neurology and COPD patients. Half incidents <2 weeks and on night shift.                      |
| Hunt et al (2007) <sup>135</sup>                 | NCI              | 222      | England      | Previous attempt history, recent adverse event, active mental illness, comorbidity and absconding were predictive.                   |
| Hunt et al (2010) <sup>24</sup>                  | NCI              | 1851     | England      | People who died by suicide who absconded. Likely young, unemployed, homeless, schizophrenic, previous violence and substance misuse. |
| Hunt et al (2013) <sup>136</sup>                 | NCI              | 107      | England      | IP suicides <1 week. Risk with recent diagnosis, acutely ill, recent adverse life events. 64% died off the ward.                     |
| Keller and Wolfersdorf (1995) <sup>137</sup>     | Hospital records | *        | Germany      | IP suicide rates rose 1970-79 and fell 1980-92 along with change in treatment policies.                                              |
| Kessing and Munk-Jørgensen (2004) <sup>138</sup> | Case register    | 117      | Denmark      | Adjusting for severity, IP not OP admission predicted higher risk for rehospitalization and suicide.                                 |
| Kessing (2004) <sup>88</sup>                     | Case register    | 81       | Denmark      | Severity of depressive illness (ICD-10) is predictive of suicide risk (validating the grading typology).                             |
| King et al (2001) <sup>139</sup>                 | Case-control     | 234      | Wessex       | Higher risk with disruption of continuity of care, job loss, prior self-harm, unplanned discharge, suicidal ideation.                |

|                                                  |                |     |                   |                                                                                                                       |
|--------------------------------------------------|----------------|-----|-------------------|-----------------------------------------------------------------------------------------------------------------------|
| King et al (2001) <sup>140</sup>                 | Case-control   | 59  | Wessex            | Prior DSH, involuntary admission, police involvement, depressed, property violence, absconder, caregiver away.        |
| Kjelsberg et al (1994) <sup>141</sup>            | Case-control   | 35  | Norway            | Adolescents: disruptive, help-rejecting, immature, poor self-esteem, learning difficulties, abusive parents,          |
| Krupinski et al (1998) <sup>142</sup>            | Case-control   | 33  | Munich            | Suicidal tendencies on admission and prior attempting best predictors, comprehensive suicide assessments needed.      |
| Krupinski et al (1998) <sup>143</sup>            | Case-control   | 33  | Munich            | Suicides were prescribed lithium less frequently than controls and neuroleptics more often.                           |
| Kullgren (1988) <sup>144</sup>                   | Case-control   | 15  | Sweden            | Borderline personality disorder. More hospitalizations, suicidal behaviour. Half died when unilaterally discharged.   |
| Kuo et al (2005) <sup>145</sup>                  | Case-control   | 78  | Taipei            | Schizophrenia. Depressive syndrome, higher suicide intensity. Unlike in West, living alone and drugs not factors.     |
| Lawrence et al (1999) <sup>146</sup>             | Cohort         | 471 | Western Australia | Risk higher for younger, males, marrieds (contrary to population findings), adjustment reactions, longer stays.       |
| Lee and Lin (2009) <sup>147</sup>                | Case-control   | 87  | Taiwan            | Schizophrenia. Higher risk shortly after discharge. Lower suicide risk with younger attending psychiatrists.          |
| Li et al (2008) <sup>20</sup>                    | Case-control   | 64  | Guangzhou         | Schizophrenic patients with guilty thoughts, depressed mood, suicidal ideation and attempt 1 month pre-admission.     |
| Lin et al (2009) <sup>148</sup>                  | Case-control   | 311 | Taiwan            | Discharged cancer patients, unemployed more at risk <3 months postdischarge.                                          |
| Luxton et al (2013) <sup>149</sup>               | Cohort         | 153 | United States     | US Military hospitals. Suicides were 50% of deaths. Frequencies highest within <30-90 days after discharge.           |
| Marusic et al (2002) <sup>150</sup>              | Case-control   | 58  | Slovenia          | Females>males among IP suicides suggests undiagnosed depression among community males.                                |
| McKenzie and Wurr (2001) <sup>151</sup>          | Case-control   | 77  | Bradford, UK      | Early (<3 months) vs late suicide predicted by history of DSH, mood disorder present, longer case (progress) notes.   |
| Modestin and Hoffman (1989) <sup>152</sup>       | Case-control   | 102 | Berne Canton      | Compared IP suicides with suicides <1 year postdischarge. Several differences noted in the 2 groups.                  |
| Modestin and Kopp (1988) <sup>153</sup>          | Case-control   | 75  | Switzerland       | Affective disorder included. Risk higher in males, with prior suicide attempts and more hospital admissions.          |
| Modestin and Schwarzenbach (1992) <sup>154</sup> | Case-control   | 64  | Switzerland       | Less neuroleptics and no lithium was prescribed, compared with controls.                                              |
| Modestin et al (1992) <sup>155</sup>             | Case-control   | 53  | Switzerland       | Schizophrenia. Suicidality in index admission, vocational difficulties and admission duration predicted 82% of cases. |
| Morgan and Stanton (1997) <sup>156</sup>         | Questionnaires | 18  | Avon              | Compared Avon IP suicides with earlier group. Apparent clinical improvement without stress resolution was misleading. |

|                                            |                      |      |                |                                                                                                                             |
|--------------------------------------------|----------------------|------|----------------|-----------------------------------------------------------------------------------------------------------------------------|
| Myers and Neal (1978) <sup>157</sup>       | Records              | 256  | Shropshire     | More Eastern Europeans, broken marriages, previous attempts (violent); 63% saw doctor <1 month earlier.                     |
| Neuner et al (2011) <sup>158</sup>         | Matched case-control | 133  | Germany        | Pharmacotherapy: Other than possible underuse of lithium in affectives no inter-group differences                           |
| Perez-Carceles et al (2001) <sup>159</sup> | Case-control         | 34   | Spain          | Prison hospital suicides, compared with general population. Schizophrenia in 65%; hanging in 94%.                           |
| Pirkis et al (2002) <sup>160</sup>         | Matched case-control | 597  | Australia      | Hospital admission <1 year or community contact for registration only (not follow-up) were maximum risk factors.            |
| Pirkola et al (2005) <sup>161</sup>        | Case-control         | 1407 | Finland        | Hospital suicides <1 week postdischarge. More severe psychopathology, poorer functioning, more lethal methods.              |
| Powell et al (2000) <sup>162</sup>         | Case-control         | 112  | England        | Suicidality prior to or at admission, recent bereavement, delusions, hopelessness, family history were risks.               |
| Qin and Nordentoft (2005) <sup>163</sup>   | Nested case-control  | 9316 | Denmark        | Sharp peaks first week after admission and discharge. Recommend systematic evaluation and treatment at these times.         |
| Qin et al (2009) <sup>164</sup>            | Case register        | 712  | Denmark        | Paracetamol poisoning predictive of subsequent suicide (Adj IRR = 10.9)                                                     |
| Robin et al (1968) <sup>165</sup>          | Records              | 73   | Southend       | Suicide during or shortly after treatment.                                                                                  |
| Rorsman (1973) <sup>166</sup>              | Records              | 46   | Lund           | Previous attempt in 56%; men bereaved or divorced, females living alone.                                                    |
| Roy and Draper (1995) <sup>167</sup>       | Records              | 37   | Brockville, ON | Schizophrenia and involuntary detention preponderant, compared with controls; more living alone                             |
| Roy (1982) <sup>168</sup>                  | Records              | 15   | Toronto        | Young, unemployed, alone, depressed. Suicide <1 month postdischarge in 44%.                                                 |
| Shah and Ganesvaran (1997) <sup>169</sup>  | Matched case-control | 60   | Melbourne      | Schizophrenia diagnosis, DSH, longer stay, frequent ward transfers, unstable suicidal ideation were risks.                  |
| Sharma et al (1998) <sup>81</sup>          | Matched case-control | 44   | London, ON     | Majority suffered mood disorders, some with cycling, fluctuating mental state. Suicide risk noted only in 32%.              |
| Stebalj et al (1999) <sup>170</sup>        | Matched case-control | 79   | Ljubljana      | Suicides with schizophrenia and affective psychoses, compared with controls. Depressed mood, past suicidal behaviour risks. |
| Sundqvist-Stensman (1987) <sup>171</sup>   | Case register        | 57   | Uppsala        | Frequent admissions. Hanging on wards; drowning when absconding.                                                            |
| Suominen et al (2002) <sup>172</sup>       | Case-control         | 26   | Finland        | General hospital suicides mostly suffer concurrent major depression, calling for early recognition and treatment.           |
| Taiminen and Kujari (1994) <sup>173</sup>  | Case-control         | 28   | Turku          | Suicide group had lower neuroleptic doses and more frequent and diazepam medication. Depression frequent.                   |

|                                         |                      |     |           |                                                                                                                 |
|-----------------------------------------|----------------------|-----|-----------|-----------------------------------------------------------------------------------------------------------------|
| Taiminen (1993) <sup>174</sup>          | Case-control         | 25  | Turku     | Schizophrenia or paranoid included. History of suicide attempts. More negative symptoms and depression.         |
| Thong et al (2008) <sup>175</sup>       | Matched case-control | 123 | Singapore | Logistic regression yielded prior potentially lethal suicide attempt, comorbid physical illness and delusions.  |
| Wolfersdorf et al (1997) <sup>176</sup> | Case-control         | 585 | Germany   | Hospital rates rose 1970-93 because of shorter stays, rapid and premature discharges of schizophrenic patients. |

COPD = chronic obstructive pulmonary disease

DSH = deliberate self-harm

IP = inpatient

NCI = National Confidential Inquiry

OP = outpatient

**eTable 3 Uncontrolled descriptive studies**

| Study (year)                                 | Type             | Years    | Suicides, N | Place           | Findings                                                                                                                       |
|----------------------------------------------|------------------|----------|-------------|-----------------|--------------------------------------------------------------------------------------------------------------------------------|
| Ajdacic-Gross et al (2009) <sup>177</sup>    | Case register    | 13       | 141         | Zürich          | Risk high in personality and affective disorders; most during authorized leave; assessed as no suicide risk.                   |
| Allebeck et al (1986) <sup>178</sup>         | Case register    | 10       | 33          | Stockholm       | Schizophrenic cohort. Younger patients predominate.                                                                            |
| Allgulander et al (1992) <sup>179</sup>      | Record-linkage   | 15       | 1582        | Stockholm       | Highest risk for affective disorders (3-fold) followed by unspecified psychoses.                                               |
| Andersen et al (2000) <sup>180</sup>         | Record-linkage   | 4.7      | 472         | Denmark         | 42% previously hospitalized; 20% recently discharged; 66% recently saw GP.                                                     |
| Bahmanyar et al (2009) <sup>181</sup>        | Register-linkage | 8 & 16.3 | 820         | Sweden          | Peptic ulcer patients carry higher suicide risk whether operated on (SMR 1.6) or not (SMR 1.7).                                |
| Barner-Rasmussen et al (1986) <sup>182</sup> | Case register    | 12       | 6,564       | Denmark         | 21% while inpatients; 79% <1 year after discharge.                                                                             |
| Bassett and Tsourtos (1993) <sup>66</sup>    | Charts           | 10       | 6           | South Australia | Increased numbers coincidental with greater acuity.                                                                            |
| Baxter and Appleby (1999) <sup>183</sup>     | Case Register    | 18       | 117         | Salford         | 68% of people who died by suicide had history of hospital admission.                                                           |
| Busch et al (2003) <sup>184</sup>            | Records          |          | 76          | United States   | 79% SADS agitated; 78% denied suicide ideation before death.                                                                   |
| Busch et al (1993) <sup>185</sup>            | Charts           | 7        | 14          | United States   | Comorbid psychic anxiety with psychosis and (or) depression.                                                                   |
| Copas and Robin (1982) <sup>186</sup>        | Records          | 7        | 696         | United Kingdom  | Risks higher in males, highest in first week and fall off thereafter.                                                          |
| Goh et al (1989) <sup>187</sup>              | Records          | 8        | 57          | Birmingham      | Violent deaths in both sexes. Patients with chronic illness.                                                                   |
| Hintikka and Viinamaki (1998) <sup>188</sup> | Charts           | 3        | 5           | Finland         | 5 cases of people who died by suicide <1 day after discharge may have been inadequately assessed, at a time of major bed cuts. |
| Johansson et al (1996) <sup>189</sup>        | Charts           | 2        | 59          | Stockholm       | Foreign-born at 2-fold risk, suggestive of dysacculturation, unemployment, social degradation, rootlessness.                   |



|                                           |                  |      |      |               |                                                                                                                           |
|-------------------------------------------|------------------|------|------|---------------|---------------------------------------------------------------------------------------------------------------------------|
| Jones et al (2011) <sup>190</sup>         | Case register    | 28   | 218  | England       | Special hospital inpatients. No relation between legal category and suicide. Women particularly at high risk.             |
| King (2001) <sup>191</sup>                | Coroners         | 5    | 236  | Wessex        | 41% of people who died by suicide referred before deaths but only 27% in contact 1 year before, of whom 60% had been IPs. |
| Martin (2000) <sup>17</sup>               | Hospital records | 31.5 | 276  | Toronto       | 22% occurred in hospital and 42% while on passes. 20% <1 week after admission, 52% <1 month.                              |
| Meehan et al (2006) <sup>192</sup>        | NCI              | 4    | 4859 | England       | Compared inpatient suicides vs. discharged <3 months. 219 deaths considered preventable.                                  |
| Mills et al (2008) <sup>16</sup>          | Records          | 6.5  | 42   | United States | VA Root Cause Analyses hospital suicides (42) & attempts (143) reviewed. Hanging, cutting, and overdose in 70%.           |
| Modestin and Wurmle (1989) <sup>193</sup> | Records          | 9    | 115  | Switzerland   | No contagion or modeling effect observed between suicides.                                                                |
| Morgan and Priest (1991) <sup>194</sup>   | Questionnaires   | 2.5  | 27   | Bristol       | Problems with communication with patients on leave or between staff members relevant.                                     |
| Mortensen and Juel (1993) <sup>195</sup>  | Registers        | 18   |      | Denmark       | First episode schizophrenia admissions. Suicide caused 50% deaths in men and 35% in women but RR women>men.               |
| Neuner et al (2008) <sup>19</sup>         | BADO             | 10   | 41   | Regensburg    | Pharmacotherapy resistance, prior attempt, severe side effects, supportive psychotherapy pre-admission predictive.        |
| Neuner et al (2010) <sup>196</sup>        | BADO             | 10   | 37   | Germany       | Other than 78% IP suicides <50 days postadmission no time patterns. 14/37 (38%) on public holidays.                       |
| Nordentoft et al (1993) <sup>197</sup>    | Registry linkage | 10   | 103  | Copenhagen    | >2 prior attempts, older, manic-depressive, living alone, not treated in respirator predictive of higher risk.            |
| Papadopoulos (2008) <sup>198</sup>        | Hospital records | 5    | 2    | Athens        | Of 5836 deaths in a public hospital only 2 were registered as suicide. Probably understated owing to forensic referral.   |
| Proulx et al (1997) <sup>199</sup>        | Hospital records | 5    | 100  | Montreal      | General hospital suicides more predictable than chronic psychiatric patients. Need careful assessing of all suicidal IP.  |
| Ripley (1979) <sup>200</sup>              | Hospital records | 10   | 14   | Seattle       | Medical and surgical inpatients not referred to psychiatrist had symptoms of depression and suicidal ideation.            |

|                                             |                  |    |    |               |                                                                                                                           |
|---------------------------------------------|------------------|----|----|---------------|---------------------------------------------------------------------------------------------------------------------------|
| Shapiro and Waltzer (1980) <sup>201</sup>   | Hospital records | 15 | 16 | New York      | Detailed case descriptions of suicides and serious attempts on medical wards in a general hospital.                       |
| Speissl et al (2002) <sup>202</sup>         | BADO             | 10 | 30 | Regensburg    | State psychiatric hospital. Suicides primarily diagnosed with schizophrenia, higher cumulative length of stay, prior DSH. |
| Taiminen and Helenius (1994) <sup>203</sup> | Hospital records | 25 | 59 | Turku         | No evidence for suicide contagion (temporal clustering).                                                                  |
| Taiminen et al (1996) <sup>204</sup>        | Hospital records | 11 | 7  | Turku         | Suicide frequency may decrease with staff experience of suicidal people.                                                  |
| Temoche et al (1964) <sup>205</sup>         | Case register    | 3  | 30 | Massachusetts | Early postdischarge period (<6 months) most risk.                                                                         |
| Tseng et al (2011) <sup>29</sup>            | Hospital records | 10 | 27 | Taiwan        | Age-standardized suicide in general hospital 8 times higher than in general public, signalling need for risk alertness.   |

DSH = deliberate self-harm

GP = general practitioner

IP = inpatient

NCI = National Confidential Inquiry

SADS = Schedule for  
Affective Disorders and  
Schizophrenia

SMR = standardized  
mortality ratio

VA = Veterans Affairs
